# Supplementary material for: Management of sharps injuries in the healthcare setting
Source: HighWire-hosted journal article supplement (doi:10.1136/bmj.h3733), 2015-07-29

## 1 First aid

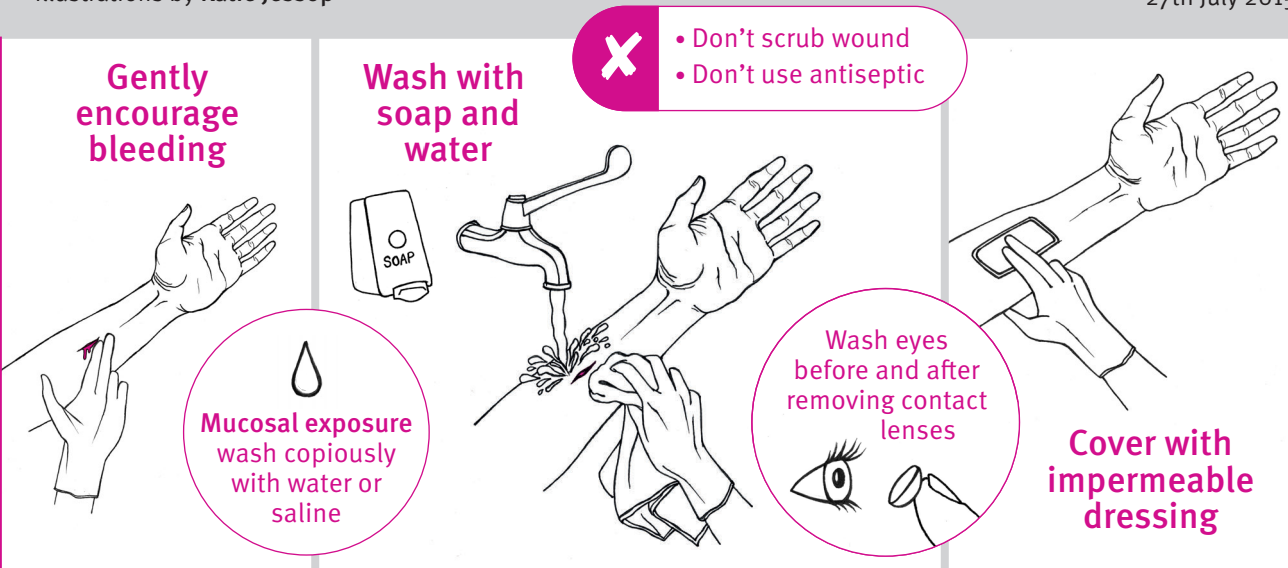

## 2 Assess incident risk

| Incident risk:  | High          | Low                       | Minimal                                                                                                                                 |
|-----------------|---------------|---------------------------|-----------------------------------------------------------------------------------------------------------------------------------------|
| Injury          | Deep          | Superficial               | No skin breach                                                                                                                          |
| Needle use      | Intravascular | Suturing/<br>Subcutaneous | Not used on patient                                                                                                                     |
| Age of sharps   | Recently used | Old, discarded            | Contact with low risk fluids:<br><ul style="list-style-type: none"> <li>Saliva</li> <li>Urine</li> <li>Vomit</li> <li>Faeces</li> </ul> |
| Blood on sharps | Visible       | Not visible               |                                                                                                                                         |

## 3 Assess source patient

for blood borne viruses. HIV, Hepatitis B (HBV) and hepatitis C (HCV) are the most common. Post-exposure prophylaxis (PEP) and/or follow up treatment may be required.

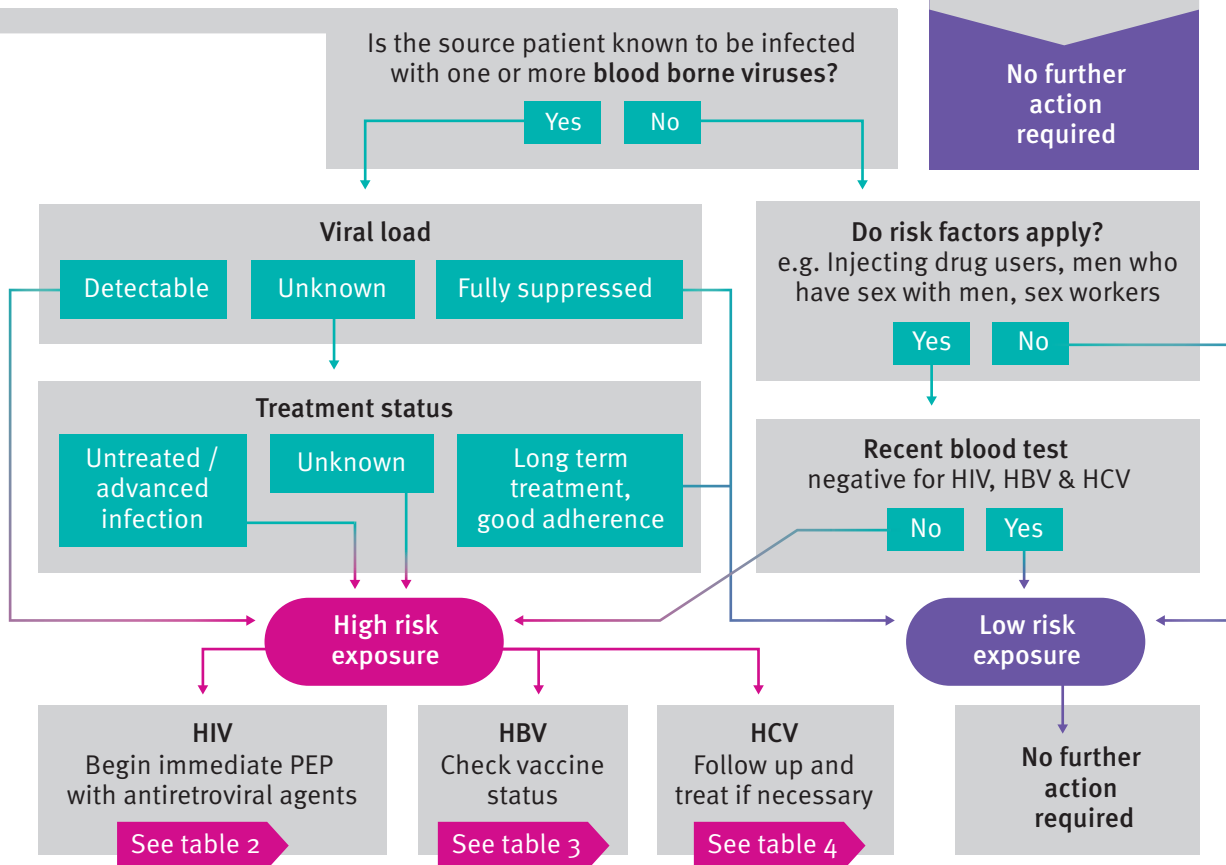

Supplement: sharps_infographic_web_sm3.pdf [file sharps_infographic_web_sm3.pdf]
